# Supplementary material for: Tuning the fluorescence based on the combination of TICT and AIE emission of a tetraphenylethylene with D–π–A structure
Source: PubMed Central journal article supplement — RSC Adv. 2020 Apr 9;10(25):14520–4. doi: 10.1039/d0ra00107d (PMC9051877; doi:10.1039/d0ra00107d), 2020-04-09
Supplement: RA-010-D0RA00107D-s001.pdf [file RA-010-D0RA00107D-s001.pdf]

## Supporting Information

### **Tuning the fluorescence based on the Combination of TICT and AIE Emission of a Tetraphenylethylene with D- $\pi$ -A Structure**

Mengxing Zhang,<sup>a</sup> Jiale Li,<sup>a</sup> Lirong Yu,<sup>a</sup> Xi Wang \*<sup>a</sup> and Ming Bai \*<sup>a,b</sup>

<sup>a</sup> Marine College, Shandong University, Weihai, Weihai 264209, People's Republic of China.

E-mail: xi\_wang@sdu.edu.cn; ming\_bai@sdu.edu.cn;

<sup>b</sup> SDU - ANU Joint Science College, Shandong University, Weihai, Weihai 264209,  
People's Republic of China.

## Synthesis of TPEOMeCN

TPEOMeCN was synthesized with some of the modifications according to the reported work.<sup>1</sup> TEA (11.2 mL, 80 mmol) was added to the solution mixed with 4,4'-dihydroxybenzophenone (4.28 g, 20 mmol), DCM (120 mL) and THF (33.4 mL). Trimethylacetyl chloride (9.84 mL, 80 mmol) was added to the above reaction mixture and stirred at room temperature. The reaction mixture was treated with HCl and extracted with EtOAc after the completion of the reaction monitored by TLC analysis. The combined organic layer was dried over anhydrous Na<sub>2</sub>SO<sub>4</sub>. The filtrate was concentrated in vacuo after filtration, and the resulting residue was purified via silica gel flash column chromatography using DCM as the eluent to obtain the white powder 4,4'-carbonylbis(4,1-phenylene)bis(2,2-dimethylpropanoate) (7.02 g). The 4,4'-carbonylbis(4,1-phenylene)bis(2,2-dimethylpropanoate) (3.82 g, 10 mmol), carbon tetrabromide (6.63 g, 20 mmol), and triphenyl phosphine (10.49 g, 40 mmol) were mixed in anhydrous toluene. It reacted at 120°C for 4 days under the protection of nitrogen. Then the mixture was cooled down to room temperature. The mixture was filtered, washed with toluene and the filtrate was collected. The organic layer was separated, dried with Na<sub>2</sub>SO<sub>4</sub>, and then the solvent was removed by rotary evaporator. After the residue was purified by column chromatography on silica gel using n-hexane as the eluent to obtain the light yellow solid 4,4'-(2,2-dibromoethene-1,1-diyl)bis(4,1-phenylene)bis(2,2-dimethylpropanoate) (2.80 g). The 4,4'-(2,2-dibromoethene-1,1-diyl) bis(4,1-phenylene) bis(2,2-dimethylpropanoate) (2.69 g, 5 mmol) and K<sub>2</sub>CO<sub>3</sub> (2.3 g, 16.5 mmol) were dissolved in MeOH (120 mL) and DCM (20 mL). The reaction mixture was stirred for 12 h at room temperature. The product was concentrated in vacuo and DCM was used as extractant. The combined organic layer was dried over anhydrous Na<sub>2</sub>SO<sub>4</sub>. After filtration, the filtrate was concentrated in vacuo and the resulting residue was purified via silica gel flash column chromatography using DCM/n-hexane (v/v: 1:1) as the eluent to obtain the light yellow solid 4,4'-(2,2-dibromoethene-1,1-diyl)diphenol (1.52g). The 4,4'-(2,2-dibromoethene-1,1-diyl)diphenol (1.11 g, 3 mmol), methyl iodide (0.56 g, 9 mmol), and K<sub>2</sub>CO<sub>3</sub> (4.15 g, 30 mmol) were dissolved in 50 mL of

acetone. After stirring for 24 h at 70°C, the reaction mixture was concentrated in vacuo. The organic layer was separated and the aqueous layer was extracted three times with DCM. The combined organic layer was dried over anhydrous Na<sub>2</sub>SO<sub>4</sub>. After filtration, the filtrate was concentrated in vacuo and the resulting residue was purified via silica gel flash column chromatography using n-hexane/ DCM (v/v: 6:4) as the eluent to obtain 4,4'-(2,2-dibromoethene-1,1-diyl) bis ((methoxy)benzene) (0.9 g). The 4,4'-(2,2-dibromoethene-1,1-diyl) bis ((methoxy)benzene) (0.80 g, 2 mmol), 4-cyanophenylboric acid (1.47 g, 10 mmol), K<sub>2</sub>CO<sub>3</sub> (2.76 g, 10 mmol) and Pd(PPh<sub>3</sub>)<sub>4</sub> (0.23 g, 0.2 mmol) was added into 50 mL of toluene under nitrogen protection. Then, 2 mL of water and 2 mL of ethanol were added into the above solution and it reacted at 120°C for 12 h. The product was concentrated in vacuo and DCM was used as extractant. The combined organic layer was dried over anhydrous Na<sub>2</sub>SO<sub>4</sub>. After filtration, the filtrate was concentrated in vacuo and the resulting residue was purified via silica gel flash column chromatography using n-hexane/ DCM (v/v: 4:6). Finally, the white powder TPEOMeCN was obtained (0.63 g).

#### Reference

1. Z. Chen, T. Chen, J. Liu, G. Zhang, C. Li, W. Gong, Z. Xiong, N. Xie, B. Tang, M. Zhu, *Macromolecules*, 2015, **48**, 7823.

## Captions

**Figure S1.**  $^1\text{H}$  NMR spectrum of **TPEOMeCN** in  $\text{CDCl}_3$ .

**Figure S2.** 2D COSY spectrum of compound **TPEOMeCN** in  $\text{CDCl}_3$

**Figure S3.**  $^{13}\text{C}$  NMR spectrum of **TPEOMeCN** in  $\text{CDCl}_3$ .

**Figure S4.** ESI-MS spectrum of **TPEOMeCN**.

**Figure S5.** Fluorescence spectrum of **TPEOMeCN** crystals

**Figure S6.** Normalized UV-Vis spectra of **TPEOMeCN** in different solvents.

**Figure S7.** Normalized fluorescence spectra of **TPEOMeCN** in DMSO and DMF.

**Figure S8.** UV-vis spectra of **TPEOMeCN** in  $\text{H}_2\text{O}$ -DMSO mixtures with different water fractions.

**Figure S9.** Normalized fluorescence spectra of **TPEOMeCN** (fresh prepared and kept for 2 h) in  $\text{H}_2\text{O}$ -DMSO mixtures ( $f_w = 50\%$ ).

**Figure S10.** Fluorescence spectra of **TPEOMeCN** in  $\text{H}_2\text{O}$ -DMSO mixtures with different water fractions; Fluorescent intensity of 423 nm and 518 nm respond to the changes of water fractions in  $\text{H}_2\text{O}$ -DMSO mixtures. The water used have different pH values: pH=2.20 (A) and (B); pH=11.02 (C) and (D). Concentration: 50  $\mu\text{M}$ ;  $\lambda_{\text{ex}}$ : 320 nm (5 nm, 5 nm).

**Figure S11.** Linear fitting of double logarithmic plots of intensity versus viscosity for **TPEOMeCN** (Viscosity  $\leq 151.9$  cP).

**Table S1.** Crystal data and structure refinement for **TPEOMeCN**.

**Table S2.** Photophysical properties of **TPEOMeCN** in different solvents

**Table S3.** Solvent composition and viscosity

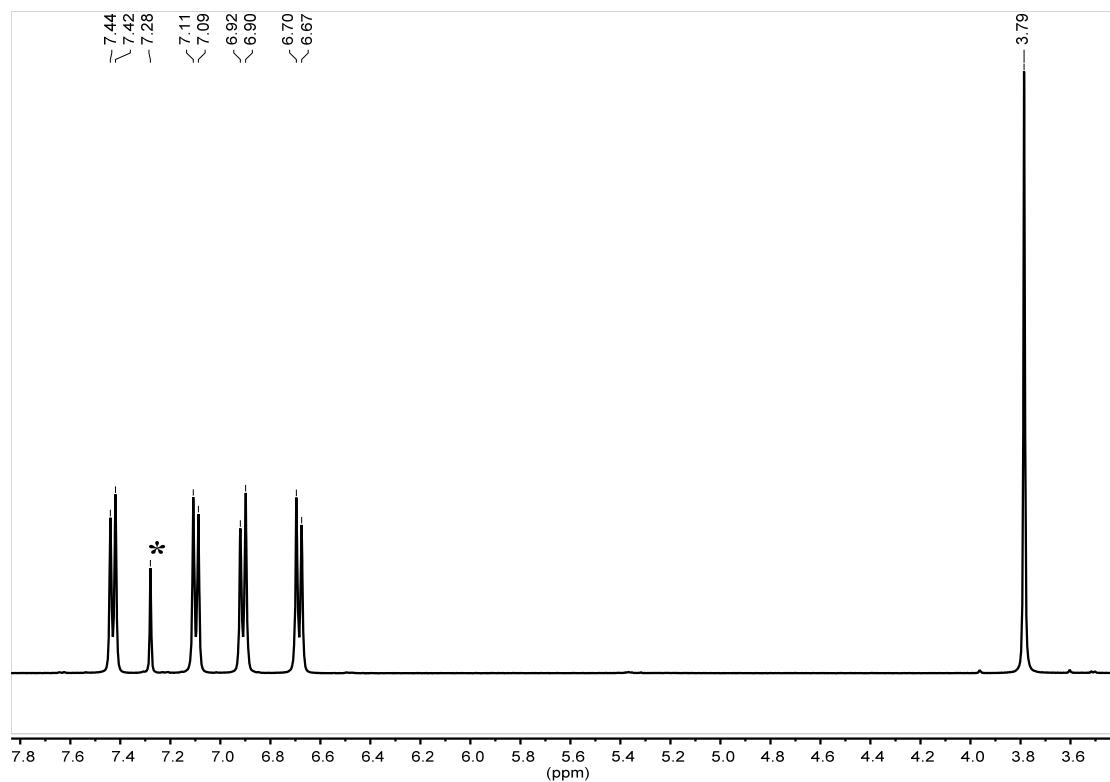

**Figure S1.**  $^1\text{H}$  NMR spectrum of TPEOMeCN in  $\text{CDCl}_3$ . The residual solvent signals are marked with asterisk.

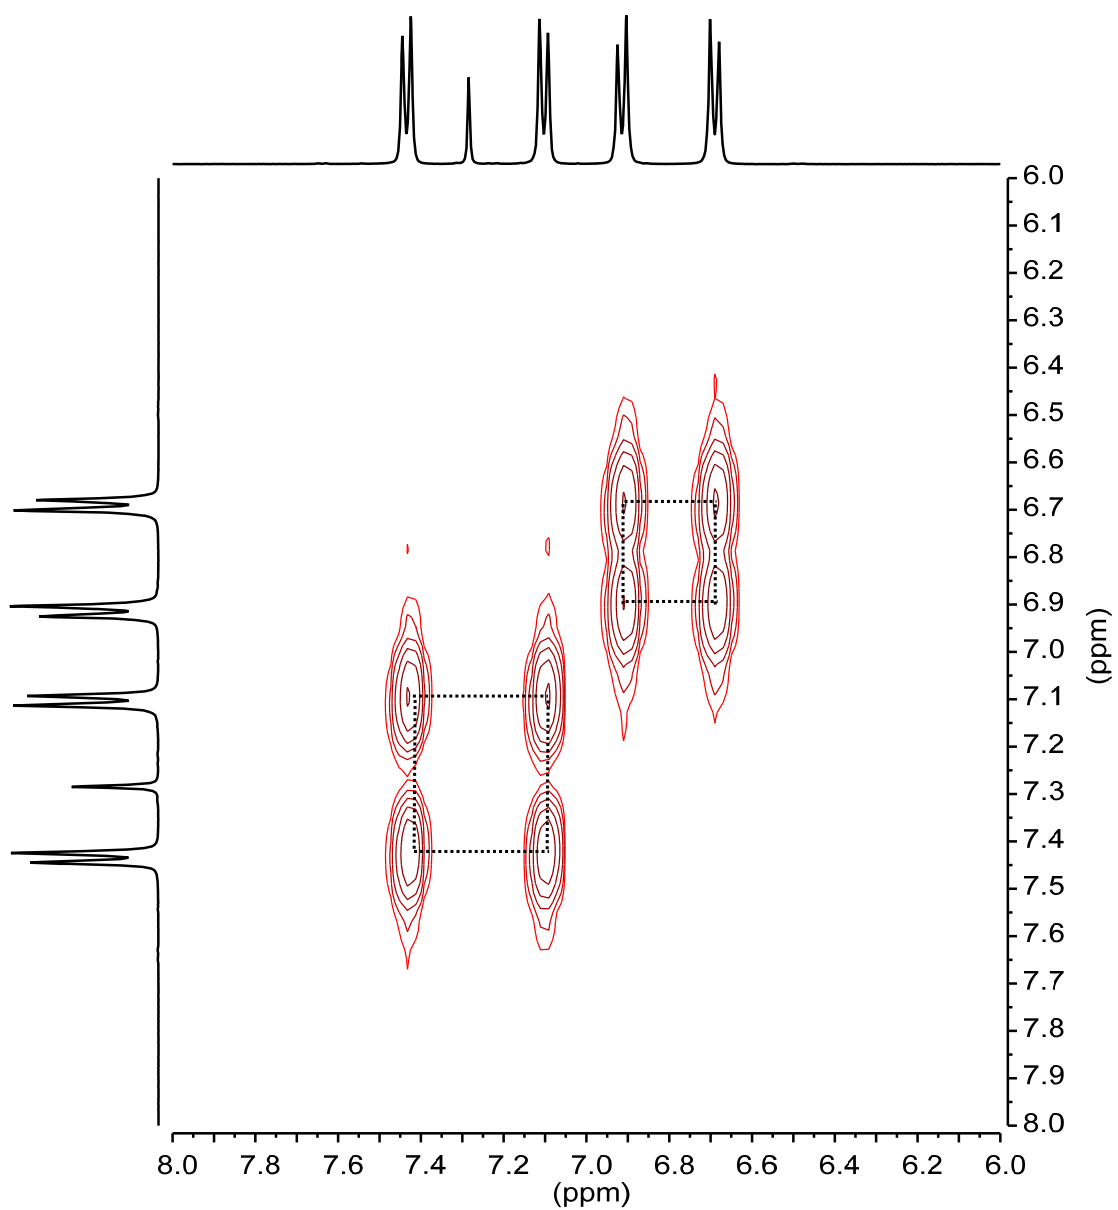

**Figure S2.** 2D COSY spectrum of **TPEOMeCN** in  $\text{CDCl}_3$

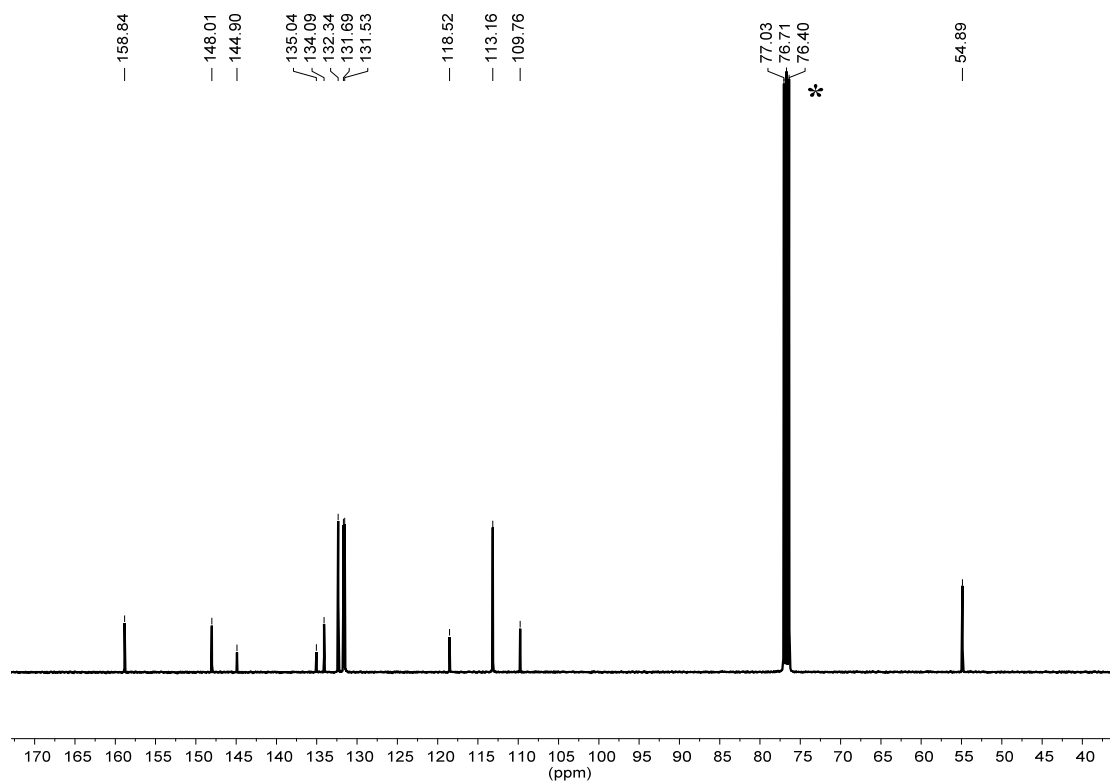

**Figure S3.**  $^{13}\text{C}$  NMR spectrum of compound TPEOMeCN in  $\text{CDCl}_3$ . The residual solvent signals are marked with asterisks.

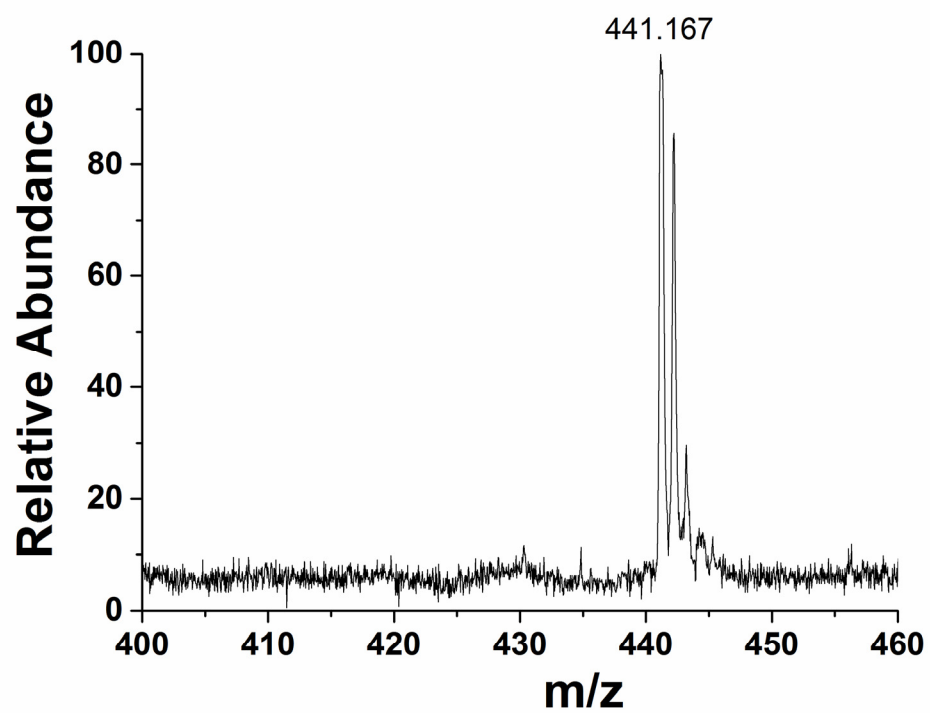

**Figure S4.** MALDI-TOF mass spectrum of compound TPEOMeCN.



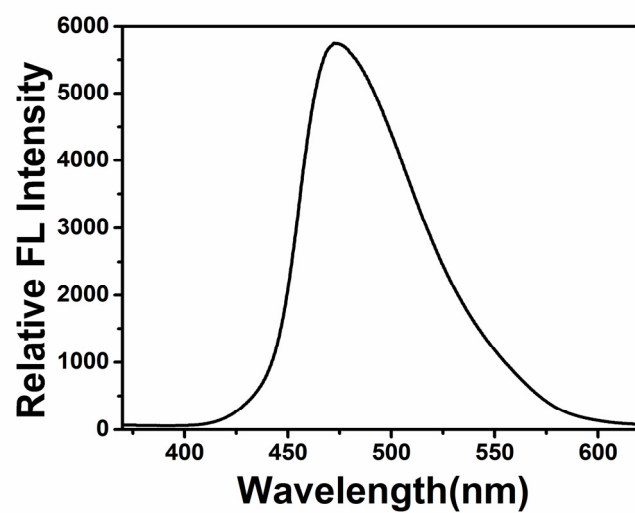

**Figure S5.** Fluorescence spectrum of TPEOMeCN crystals

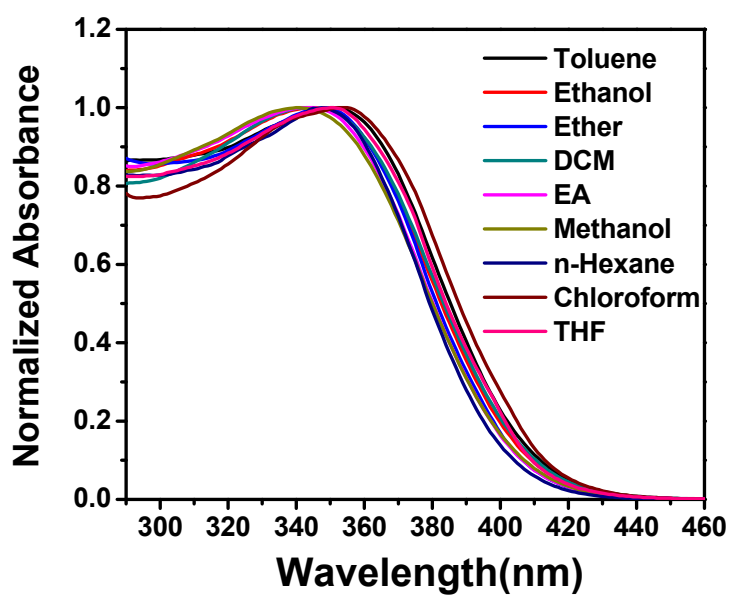

**Figure S6.** Normalized UV-Vis spectra of TPEOMeCN in different solvents.

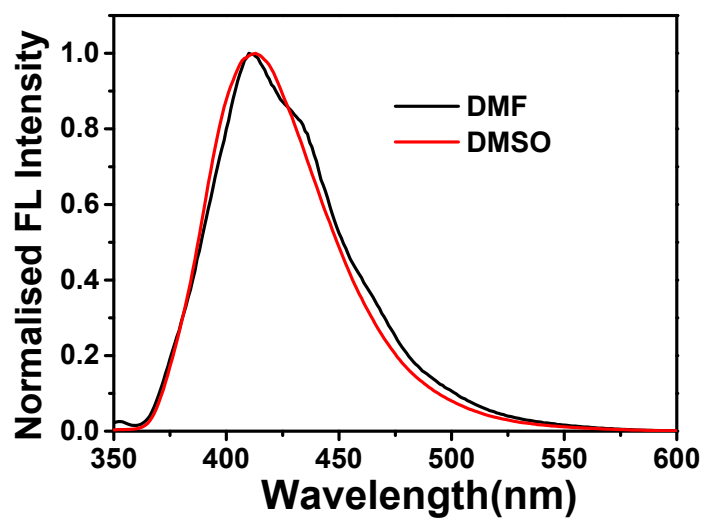

**Figure S7.** Normalized fluorescence spectra of TPEOMeCN in DMSO and DMF.

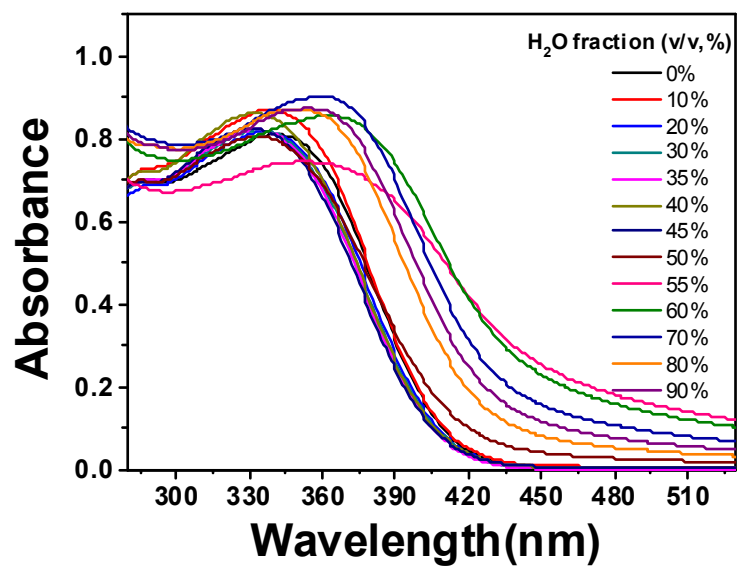

**Figure S8.** Uv-vis spectra of TPEOMeCN in H<sub>2</sub>O-DMSO mixtures with different water fractions. Concentration: 50  $\mu$ M.

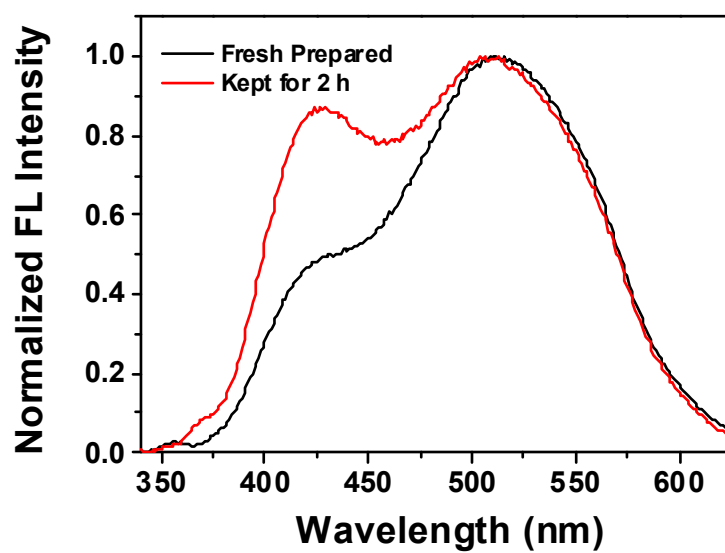

**Figure S9.** Normalized fluorescence spectra of TPEOMeCN (fresh prepared and kept for 2 h) in H<sub>2</sub>O-DMSO mixtures ( $f_w = 50\%$ ).

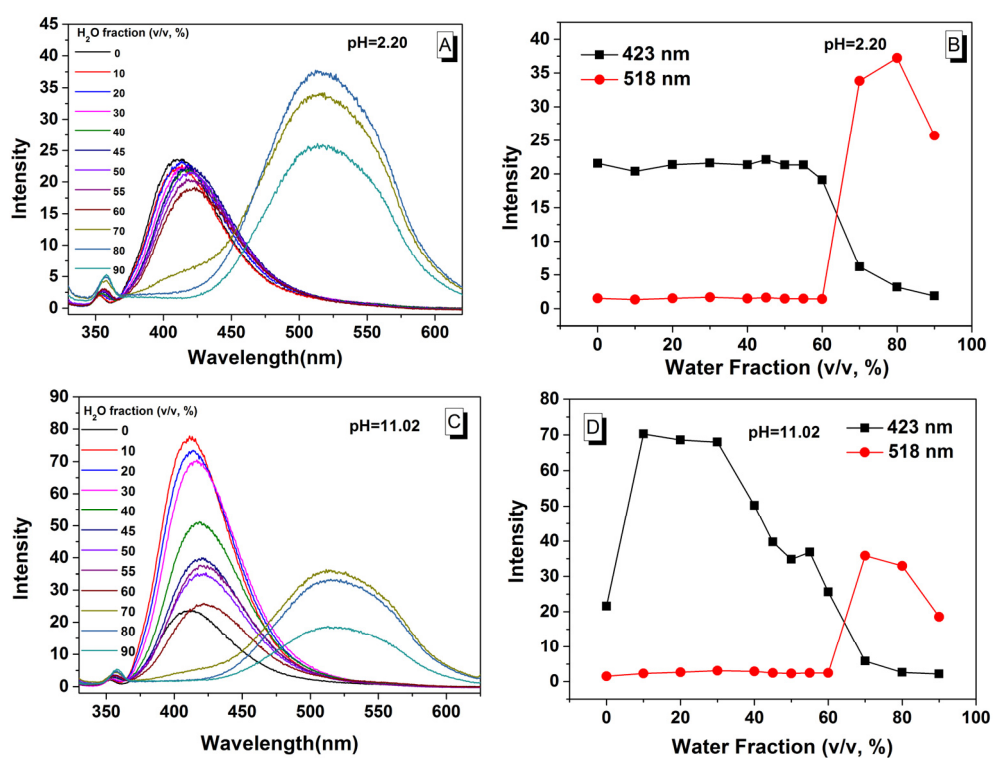

**Figure S10.** Fluorescence spectra of TPEOMeCN in H<sub>2</sub>O-DMSO mixtures with different water fractions; Fluorescent intensity of 423 nm and 518 nm respond to the changes of water fractions in H<sub>2</sub>O-DMSO mixtures. The water used have different pH values: pH=2.20 (A) and (B); pH=11.02 (C) and (D). Concentration: 50  $\mu$ M;  $\lambda_{\text{ex}}$ : 320 nm (5 nm, 5 nm).

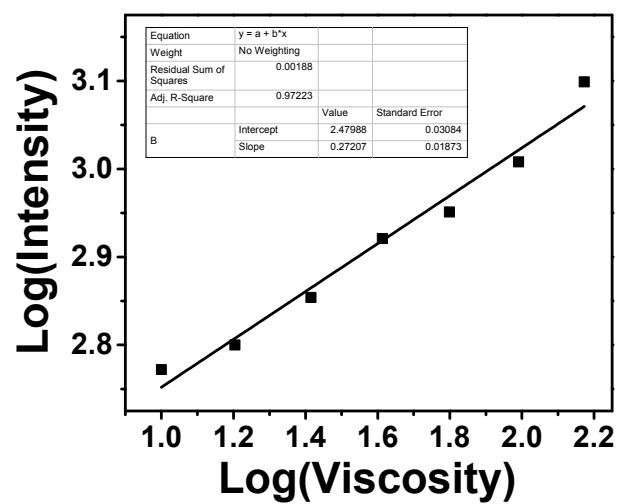

**Figure S11.** Linear fitting of double logarithmic plots of intensity versus viscosity for TPEOMeCN (Viscosity  $\leq$  151.9 cP).

**Table S1.** Crystal data and structure refinement for **TPEOMeCN**.

|                                                     |                                                                                                                                               |
|-----------------------------------------------------|-----------------------------------------------------------------------------------------------------------------------------------------------|
| Empirical formula                                   | C <sub>30</sub> H <sub>22</sub> N <sub>2</sub> O <sub>2</sub>                                                                                 |
| Formula weight                                      | 442.49                                                                                                                                        |
| Temperature                                         | 293(2) K                                                                                                                                      |
| Wavelength                                          | 1.54178 Å                                                                                                                                     |
| Crystal system, space group                         | Monoclinic , <i>P</i> 2 <sub>1</sub> / <i>n</i>                                                                                               |
| Unit cell dimensions                                | $a = 9.6368(13)\text{Å}$ $\alpha = 90^\circ$<br>$b = 15.6248(16)\text{Å}$ $\beta = 90^\circ$<br>$c = 16.1815(18)\text{Å}$ $\gamma = 90^\circ$ |
| Volume                                              | 2436.5(5) Å <sup>3</sup>                                                                                                                      |
| Z, Calculated density                               | 4, 1.206 g/cm <sup>3</sup>                                                                                                                    |
| <i>F</i> (000)                                      | 928.0                                                                                                                                         |
| Crystal size                                        | 0.20 × 0.10 × 0.05 mm                                                                                                                         |
| Theta range for data collection                     | 7.866 to 135.338 °                                                                                                                            |
| Limiting indices                                    | -11 ≤ <i>h</i> ≤ 11, -11 ≤ <i>k</i> ≤ 18, -16 ≤ <i>l</i> ≤ 9                                                                                  |
| Reflections collected / unique                      | 3222 / 2593 [ <i>R</i> (int) = 0.0220]                                                                                                        |
| Data / restraints / parameters                      | 2593 / 0 / 309                                                                                                                                |
| Goodness-of-fit on <i>F</i> <sup>2</sup>            | 1.372                                                                                                                                         |
| Final <i>R</i> indices [ <i>I</i> > 2σ( <i>I</i> )] | <i>R</i> <sub>1</sub> = 0.1260 , <i>wR</i> <sub>2</sub> = 0.3479                                                                              |
| <i>R</i> indices (all data)                         | <i>R</i> <sub>1</sub> = 0.1773, <i>wR</i> <sub>2</sub> = 0.4183                                                                               |
| Largest diff. peak and hole                         | 0.25 and -0.51 e. Å <sup>-3</sup>                                                                                                             |



**Table S2.** Photophysical properties of TPEOMeCN in different solvents <sup>a</sup>

| Solvent         | $\Delta f$ | $\lambda_{max}$ (abs) | $\lambda_{max}$ (PL) | Stokes shift (cm <sup>-1</sup> ) |
|-----------------|------------|-----------------------|----------------------|----------------------------------|
| Toluene         | 0.014      | 351                   | 434                  | 5449                             |
| Ethanol         | 0.29       | 346                   | 435                  | 5913                             |
| Diethyl Ether   | 0.25       | 348                   | 428                  | 5371                             |
| Dichloromethane | 0.22       | 343                   | 435                  | 6166                             |
| Ethyl Acetate   | 0.2        | 343                   | 429                  | 5844                             |
| Methanol        | 0.31       | 341                   | 434                  | 6284                             |
| n-Hexane        | 0.001      | 348                   | 425                  | 5206                             |
| Chloroform      | 0.15       | 352                   | 436                  | 5473                             |
| Tetrahydrofuran | 0.21       | 350                   | 432                  | 5423                             |

<sup>a</sup> Abbreviation:  $\Delta f$  = The orientational polarisability,  $\lambda_{max}$  (abs) is the lowest energy absorption peak at concentration = 50  $\mu$ M.  $\lambda_{max}$  (PL) is measured at  $\lambda_{ex}$ : 320 nm and concentration = 50  $\mu$ M.

The orientational polarizability,  $\Delta f$ , described in eq 1, is chosen as the measure of polarity.

$$\Delta f = \frac{\epsilon - 1}{2\epsilon + 1} - \frac{n^2 - 1}{2n^2 + 1} \quad (1)$$

Where  $\epsilon$  is the static dielectric constant and  $n$  is thoptical refractive index of the solvent.

**Table S3.** Solvent composition and viscosity

| DMSO/EG/Gly(mL) | Viscosity(cP) | Log(viscosity) |
|-----------------|---------------|----------------|
| 0.5/2.5/0       | 10.2          | 1.000          |
| 0.5/2.2/0.3     | 16.5          | 1.216          |
| 0.5/1.9/0.6     | 26.3          | 1.420          |
| 0.5/1.6/0.9     | 41.5          | 1.618          |
| 0.5/1.3/1.2     | 64.6          | 1.811          |
| 0.5/1.0/1.5     | 99.6          | 1.998          |
| 0.5/0.7/1.8     | 151.9         | 2.182          |
| 0.5/0.4/2.1     | 229.2         | 2.360          |
| 0.5/0.1/2.4     | 342.3         | 2.534          |
| 0.05/0.25/2.7   | 631.4         | 2.800          |
| 0.05/0.1/2.85   | 764.0         | 2.883          |
| 0.05/0/2.95     | 866.5         | 2.938          |

$$\ln \eta_{mix} = \sum_{i=1}^n w_i \cdot \ln \eta_i \quad (2)$$

Where  $\eta_{mix}$  and  $\eta_i$  stand for the viscosity of the mixture and the viscosity of component;  $i$ , respectively. Factor  $w_i$  stands for the weight fraction of component  $i$ . To calculate  $w$ , the values 1.10, 1.11, and 1.26 have been used for the density of DMSO, EG, and Gly, respectively. To calculate  $\eta$ , the values 2.47, 13.5, and 945 have been used for the viscosity of DMSO, EG, and Gly, respectively. Viscosity values for pure solvents at 20 °C were used to estimate the viscosity of the mixtures.
